# Supplementary material for: tacSTART-Triage – Anwendung für zivile und militärische Einsatzkräfte
Source: Springer Nature journal article supplement (doi:10.1007/s10049-024-01304-7), 2024-03-04
Supplement: MOESM1 [file 26818080]

## Vergleich der Vorsichtungs- Qualität von militärischen und zivilen Rettungskräften bei einem simulierten Terror- MANV während des Einsatzes am WEF in Davos 20.1.-24.1.2020 / Comparison of Triage Quality of Military and Civilian Emergency Staff

### Einführung / Introduction

**Sehr geehrte Rettungsdienstmitarbeiter (m/w/d) des Weltwirtschaftsforums Davos, wir laden Sie herzlich ein bei unserer Studie zur Qualität der Vor-Sichtung mitzumachen.**

**Die Studie wird am Ende der Schulung „tacSTART zur Vor-Sichtung“ stattfinden. Dazu werden Sie mit max. 50 Verletzten in Form von Fallvignetten oder Schauspielpatienten konfrontiert.**

**Diese gilt es zügig und korrekt auf einem Sichtungsbogen der jeweiligen Sichtungskategorie zuzuordnen. Im Anschluss an die Sichtungsphase bitten wir Sie noch einen Selbsteinschätzungsfragebogen zur Sichtsungsqualität und dem Simulationsformat auszufüllen.**

**Hier werden Ihre Daten anonymisiert erhoben und sind somit nicht auf konkrete Personen rückführbar.**

**Wir würden uns freuen, wenn sie an der Studie teilnehmen und uns dadurch helfen könnten die Schulungsmaßnahmen zur Vor-Sichtung weiter zu verbessern.**

**Mit der freiwilligen Teilnahme an der Übung und Fragebogen stimmen Sie der wissenschaftlichen Auswertung und Veröffentlichung der erhobenen Daten zu. Sollten Sie dies nicht wünschen nehmen Sie bitte weder an Übung noch Fragebogen teil und wenden sich an das Simulationsteam.**

**Weiterhin ist ein Abbruch jederzeit möglich. Der Zeitaufwand für die komplette Übung incl. Datenerfassung beträgt maximal 60min.**

**Dear Rescue Service Employees (m/f/d) of the World Economic Forum Davos, we cordially invite you to participate in our study on the quality of pre-triage. The study will take place at the end of the "tacSTART for Pre-Triage" training. You will be confronted with a maximum of 50 injured individuals in the form of case vignettes or simulated patients.**

**You will need to quickly and correctly categorize them on a triage sheet of the respective triage category. After the triage phase, we kindly ask you to fill out a self-assessment questionnaire on triage quality and the simulation format. Your data will be collected anonymously and therefore cannot be traced back to specific individuals.**

**We would be grateful if you could participate in the study and help us improve our pre-triage training measures.**

**By participating in the exercise and questionnaire voluntarily, you agree to the scientific evaluation and publication of the collected data. If you do not wish to participate, please do not take part in the exercise or questionnaire and contact the simulation team. Furthermore, it is possible to stop at any time. The total time required for the complete exercise, including data collection, is a maximum of 60 minutes.**

Vergleich der Vorsichtungs- Qualität von militärischen und zivilen  
Rettungskräften bei einem simulierten Terror- MANV während des Einsatzes am  
WEF in Davos 20.1.-24.1.2020 / Comparison of Triage Quality of Military and  
Civilian Emergency Staff

Demografische Daten / Demographic Data

\* 1. Geben Sie hier bitte die Ihnen zugeteilte Teilnehmernummer an  
Please insert the mentioned member number

\* 2. Geschlecht

Sex

- Weiblich / Female  
 Männlich / Male

\* 3. Wie alt sind Sie?

How old are you?

\* 4. Sie gehören zu?

You belong to?

- Zivil / civil  
 Militär / military  
 Beides / both

\* 5. Wieviele Jahre Berufserfahrung haben Sie in diesem Bereich ?

Since how many years do you work in this job?

\* 6. Sie arbeiten als?

Your job position is?

- nicht-ärztliches Personal  
 ärztliches Personal

\* 7. Haben Sie schon an Sichtungungsübungen teilgenommen?

Did you participate in triage trainings before?

- Nein / No  
 Ja / Yes

Vergleich der Vorsichtungs- Qualität von militärischen und zivilen  
Rettungskräften bei einem simulierten Terror- MANV während des Einsatzes am  
WEF in Davos 20.1.-24.1.2020 / Comparison of Triage Quality of Military and  
Civilian Emergency Staff

### **Vorbereitung / Preparation**

**Bitte begeben Sie sich zum Start des Sichtungsparcours und Klicken sie dann auf  
"Weiter" um mit der Sichtung zu beginnen / Please proceed to the Start of Triage  
Parcours, than klick "Forward" to start Triage**

Vergleich der Vorsichts- Qualität von militärischen und zivilen  
Rettungskräften bei einem simulierten Terror- MANV während des Einsatzes am  
WEF in Davos 20.1.-24.1.2020 / Comparison of Triage Quality of Military and  
Civilian Emergency Staff

**Sichtungsbogen / Triage Record**

**Sichten Sie die Patienten nach Triage Algorithmus und tragen Sie das Ergebnis  
passend zur PATIENTENNUMMER ein / Perform Triage according to the learned  
triage algorithm and mark the patient according to the listed PATIENT NUMBER**

\* 8. Patient mit der Nummer 1

Patient with the number 1

| Rot<br>Red            | Gelb<br>Yellow        | Grün<br>Green         | Schwarz<br>Black      |
|-----------------------|-----------------------|-----------------------|-----------------------|
| <input type="radio"/> | <input type="radio"/> | <input type="radio"/> | <input type="radio"/> |

\* 9. Patient mit der Nummer 2

Patient with the number 2

| Rot<br>Red            | Gelb<br>Yellow        | Grün<br>Green         | Schwarz<br>Black      |
|-----------------------|-----------------------|-----------------------|-----------------------|
| <input type="radio"/> | <input type="radio"/> | <input type="radio"/> | <input type="radio"/> |

\* 10. Patient mit der Nummer 3

Patient with the number 3

| Rot<br>Red            | Gelb<br>Yellow        | Grün<br>Green         | Schwarz<br>Black      |
|-----------------------|-----------------------|-----------------------|-----------------------|
| <input type="radio"/> | <input type="radio"/> | <input type="radio"/> | <input type="radio"/> |

\* 11. Patient mit der Nummer 4

Patient with the number 4

| Rot<br>Red            | Gelb<br>Yellow        | Grün<br>Green         | Schwarz<br>Black      |
|-----------------------|-----------------------|-----------------------|-----------------------|
| <input type="radio"/> | <input type="radio"/> | <input type="radio"/> | <input type="radio"/> |

\* 12. Patient mit der Nummer 5

Patient with the number 5

| Rot<br>Red            | Gelb<br>Yellow        | Grün<br>Green         | Schwarz<br>Black      |
|-----------------------|-----------------------|-----------------------|-----------------------|
| <input type="radio"/> | <input type="radio"/> | <input type="radio"/> | <input type="radio"/> |

**\* 13. Patient mit der Nummer 6**

Patient with the number 6

|                       |                       |                       |                       |
|-----------------------|-----------------------|-----------------------|-----------------------|
| Rot<br>Red            | Gelb<br>Yellow        | Grün<br>Green         | Schwarz<br>Black      |
| <input type="radio"/> | <input type="radio"/> | <input type="radio"/> | <input type="radio"/> |

**\* 14. Patient mit der Nummer 7**

Patient with the number 7

|                       |                       |                       |                       |
|-----------------------|-----------------------|-----------------------|-----------------------|
| Rot<br>Red            | Gelb<br>Yellow        | Grün<br>Green         | Schwarz<br>Black      |
| <input type="radio"/> | <input type="radio"/> | <input type="radio"/> | <input type="radio"/> |

**\* 15. Patient mit der Nummer 8**

Patient with the number 8

|                       |                       |                       |                       |
|-----------------------|-----------------------|-----------------------|-----------------------|
| Rot<br>Red            | Gelb<br>Yellow        | Grün<br>Green         | Schwarz<br>Black      |
| <input type="radio"/> | <input type="radio"/> | <input type="radio"/> | <input type="radio"/> |

**\* 16. Patient mit der Nummer 9**

Patient with the number 9

|                       |                       |                       |                       |
|-----------------------|-----------------------|-----------------------|-----------------------|
| Rot<br>Red            | Gelb<br>Yellow        | Grün<br>Green         | Schwarz<br>Black      |
| <input type="radio"/> | <input type="radio"/> | <input type="radio"/> | <input type="radio"/> |

**\* 17. Patient mit der Nummer 10**

Patient with the number 10

|                       |                       |                       |                       |
|-----------------------|-----------------------|-----------------------|-----------------------|
| Rot<br>Red            | Gelb<br>Yellow        | Grün<br>Green         | Schwarz<br>Black      |
| <input type="radio"/> | <input type="radio"/> | <input type="radio"/> | <input type="radio"/> |

**\* 18. Patient mit der Nummer 11**

Patient with the number 11

|                       |                       |                       |                       |
|-----------------------|-----------------------|-----------------------|-----------------------|
| Rot<br>Red            | Gelb<br>Yellow        | Grün<br>Green         | Schwarz<br>Black      |
| <input type="radio"/> | <input type="radio"/> | <input type="radio"/> | <input type="radio"/> |

**\* 19. Patient mit der Nummer 12**

Patient with the number 12

|                       |                       |                       |                       |
|-----------------------|-----------------------|-----------------------|-----------------------|
| Rot<br>Red            | Gelb<br>Yellow        | Grün<br>Green         | Schwarz<br>Black      |
| <input type="radio"/> | <input type="radio"/> | <input type="radio"/> | <input type="radio"/> |

**\* 20. Patient mit der Nummer 13**

Patient with the number 13

|                       |                       |                       |                       |
|-----------------------|-----------------------|-----------------------|-----------------------|
| Rot<br>Red            | Gelb<br>Yellow        | Grün<br>Green         | Schwarz<br>Black      |
| <input type="radio"/> | <input type="radio"/> | <input type="radio"/> | <input type="radio"/> |

**\* 21. Patient mit der Nummer 14**

Patient with the number 14

|                       |                       |                       |                       |
|-----------------------|-----------------------|-----------------------|-----------------------|
| Rot<br>Red            | Gelb<br>Yellow        | Grün<br>Green         | Schwarz<br>Black      |
| <input type="radio"/> | <input type="radio"/> | <input type="radio"/> | <input type="radio"/> |

**\* 22. Patient mit der Nummer 15**

Patient with the number 15

|                       |                       |                       |                       |
|-----------------------|-----------------------|-----------------------|-----------------------|
| Rot<br>Red            | Gelb<br>Yellow        | Grün<br>Green         | Schwarz<br>Black      |
| <input type="radio"/> | <input type="radio"/> | <input type="radio"/> | <input type="radio"/> |

**\* 23. Patient mit der Nummer 16**

Patient with the number 16

|                       |                       |                       |                       |
|-----------------------|-----------------------|-----------------------|-----------------------|
| Rot<br>Red            | Gelb<br>Yellow        | Grün<br>Green         | Schwarz<br>Black      |
| <input type="radio"/> | <input type="radio"/> | <input type="radio"/> | <input type="radio"/> |

**\* 24. Patient mit der Nummer 17**

Patient with the number 17

|                       |                       |                       |                       |
|-----------------------|-----------------------|-----------------------|-----------------------|
| Rot<br>Red            | Gelb<br>Yellow        | Grün<br>Green         | Schwarz<br>Black      |
| <input type="radio"/> | <input type="radio"/> | <input type="radio"/> | <input type="radio"/> |

**\* 25. Patient mit der Nummer 18**

Patient with the number 18

|                       |                       |                       |                       |
|-----------------------|-----------------------|-----------------------|-----------------------|
| Rot<br>Red            | Gelb<br>Yellow        | Grün<br>Green         | Schwarz<br>Black      |
| <input type="radio"/> | <input type="radio"/> | <input type="radio"/> | <input type="radio"/> |

**\* 26. Patient mit der Nummer 19**

Patient with the number 19

|                       |                       |                       |                       |
|-----------------------|-----------------------|-----------------------|-----------------------|
| Rot<br>Red            | Gelb<br>Yellow        | Grün<br>Green         | Schwarz<br>Black      |
| <input type="radio"/> | <input type="radio"/> | <input type="radio"/> | <input type="radio"/> |

**\* 27. Patient mit der Nummer 20**

Patient with the number 20

|                       |                       |                       |                       |
|-----------------------|-----------------------|-----------------------|-----------------------|
| Rot<br>Red            | Gelb<br>Yellow        | Grün<br>Green         | Schwarz<br>Black      |
| <input type="radio"/> | <input type="radio"/> | <input type="radio"/> | <input type="radio"/> |

**\* 28. Patient mit der Nummer 21**

Patient with the number 21

|                       |                       |                       |                       |
|-----------------------|-----------------------|-----------------------|-----------------------|
| Rot<br>Red            | Gelb<br>Yellow        | Grün<br>Green         | Schwarz<br>Black      |
| <input type="radio"/> | <input type="radio"/> | <input type="radio"/> | <input type="radio"/> |

**\* 29. Patient mit der Nummer 22**

Patient with the number 22

|                       |                       |                       |                       |
|-----------------------|-----------------------|-----------------------|-----------------------|
| Rot<br>Red            | Gelb<br>Yellow        | Grün<br>Green         | Schwarz<br>Black      |
| <input type="radio"/> | <input type="radio"/> | <input type="radio"/> | <input type="radio"/> |

**\* 30. Patient mit der Nummer 23**

Patient with the number 23

|                       |                       |                       |                       |
|-----------------------|-----------------------|-----------------------|-----------------------|
| Rot<br>Red            | Gelb<br>Yellow        | Grün<br>Green         | Schwarz<br>Black      |
| <input type="radio"/> | <input type="radio"/> | <input type="radio"/> | <input type="radio"/> |

**\* 31. Patient mit der Nummer 24**

Patient with the number 24

|                       |                       |                       |                       |
|-----------------------|-----------------------|-----------------------|-----------------------|
| Rot<br>Red            | Gelb<br>Yellow        | Grün<br>Green         | Schwarz<br>Black      |
| <input type="radio"/> | <input type="radio"/> | <input type="radio"/> | <input type="radio"/> |

**\* 32. Patient mit der Nummer 25**

Patient with the number 25

|                       |                       |                       |                       |
|-----------------------|-----------------------|-----------------------|-----------------------|
| Rot<br>Red            | Gelb<br>Yellow        | Grün<br>Green         | Schwarz<br>Black      |
| <input type="radio"/> | <input type="radio"/> | <input type="radio"/> | <input type="radio"/> |

**\* 33. Patient mit der Nummer 26**

Patient with the number 26

|                       |                       |                       |                       |
|-----------------------|-----------------------|-----------------------|-----------------------|
| Rot<br>Red            | Gelb<br>Yellow        | Grün<br>Green         | Schwarz<br>Black      |
| <input type="radio"/> | <input type="radio"/> | <input type="radio"/> | <input type="radio"/> |

**\* 34. Patient mit der Nummer 27**

Patient with the number 27

|                       |                       |                       |                       |
|-----------------------|-----------------------|-----------------------|-----------------------|
| Rot<br>Red            | Gelb<br>Yellow        | Grün<br>Green         | Schwarz<br>Black      |
| <input type="radio"/> | <input type="radio"/> | <input type="radio"/> | <input type="radio"/> |

**\* 35. Patient mit der Nummer 28**

Patient with the number 28

|                       |                       |                       |                       |
|-----------------------|-----------------------|-----------------------|-----------------------|
| Rot<br>Red            | Gelb<br>Yellow        | Grün<br>Green         | Schwarz<br>Black      |
| <input type="radio"/> | <input type="radio"/> | <input type="radio"/> | <input type="radio"/> |

**\* 36. Patient mit der Nummer 29**

Patient with the number 29

|                       |                       |                       |                       |
|-----------------------|-----------------------|-----------------------|-----------------------|
| Rot<br>Red            | Gelb<br>Yellow        | Grün<br>Green         | Schwarz<br>Black      |
| <input type="radio"/> | <input type="radio"/> | <input type="radio"/> | <input type="radio"/> |

**\* 37. Patient mit der Nummer 30**

Patient with the number 30

|                       |                       |                       |                       |
|-----------------------|-----------------------|-----------------------|-----------------------|
| Rot<br>Red            | Gelb<br>Yellow        | Grün<br>Green         | Schwarz<br>Black      |
| <input type="radio"/> | <input type="radio"/> | <input type="radio"/> | <input type="radio"/> |

**\* 38. Patient mit der Nummer 31**

Patient with the number 31

|                       |                       |                       |                       |
|-----------------------|-----------------------|-----------------------|-----------------------|
| Rot<br>Red            | Gelb<br>Yellow        | Grün<br>Green         | Schwarz<br>Black      |
| <input type="radio"/> | <input type="radio"/> | <input type="radio"/> | <input type="radio"/> |

**\* 39. Patient mit der Nummer 32**

Patient with the number 32

|                       |                       |                       |                       |
|-----------------------|-----------------------|-----------------------|-----------------------|
| Rot<br>Red            | Gelb<br>Yellow        | Grün<br>Green         | Schwarz<br>Black      |
| <input type="radio"/> | <input type="radio"/> | <input type="radio"/> | <input type="radio"/> |

**\* 40. Patient mit der Nummer 33**

Patient with the number 33

|                       |                       |                       |                       |
|-----------------------|-----------------------|-----------------------|-----------------------|
| Rot<br>Red            | Gelb<br>Yellow        | Grün<br>Green         | Schwarz<br>Black      |
| <input type="radio"/> | <input type="radio"/> | <input type="radio"/> | <input type="radio"/> |



**\* 41. Patient mit der Nummer 34**

Patient with the number 34

|                       |                       |                       |                       |
|-----------------------|-----------------------|-----------------------|-----------------------|
| Rot<br>Red            | Gelb<br>Yellow        | Grün<br>Green         | Schwarz<br>Black      |
| <input type="radio"/> | <input type="radio"/> | <input type="radio"/> | <input type="radio"/> |

**\* 42. Patient mit der Nummer 35**

Patient with the number 35

|                       |                       |                       |                       |
|-----------------------|-----------------------|-----------------------|-----------------------|
| Rot<br>Red            | Gelb<br>Yellow        | Grün<br>Green         | Schwarz<br>Black      |
| <input type="radio"/> | <input type="radio"/> | <input type="radio"/> | <input type="radio"/> |

**\* 43. Patient mit der Nummer 36**

Patient with the number 36

|                       |                       |                       |                       |
|-----------------------|-----------------------|-----------------------|-----------------------|
| Rot<br>Red            | Gelb<br>Yellow        | Grün<br>Green         | Schwarz<br>Black      |
| <input type="radio"/> | <input type="radio"/> | <input type="radio"/> | <input type="radio"/> |

**\* 44. Patient mit der Nummer 37**

Patient with the number 37

|                       |                       |                       |                       |
|-----------------------|-----------------------|-----------------------|-----------------------|
| Rot<br>Red            | Gelb<br>Yellow        | Grün<br>Green         | Schwarz<br>Black      |
| <input type="radio"/> | <input type="radio"/> | <input type="radio"/> | <input type="radio"/> |

**\* 45. Patient mit der Nummer 38**

Patient with the number 38

|                       |                       |                       |                       |
|-----------------------|-----------------------|-----------------------|-----------------------|
| Rot<br>Red            | Gelb<br>Yellow        | Grün<br>Green         | Schwarz<br>Black      |
| <input type="radio"/> | <input type="radio"/> | <input type="radio"/> | <input type="radio"/> |

**\* 46. Patient mit der Nummer 39**

Patient with the number 39

|                       |                       |                       |                       |
|-----------------------|-----------------------|-----------------------|-----------------------|
| Rot<br>Red            | Gelb<br>Yellow        | Grün<br>Green         | Schwarz<br>Black      |
| <input type="radio"/> | <input type="radio"/> | <input type="radio"/> | <input type="radio"/> |

**\* 47. Patient mit der Nummer 40**

Patient with the number 40

|                       |                       |                       |                       |
|-----------------------|-----------------------|-----------------------|-----------------------|
| Rot<br>Red            | Gelb<br>Yellow        | Grün<br>Green         | Schwarz<br>Black      |
| <input type="radio"/> | <input type="radio"/> | <input type="radio"/> | <input type="radio"/> |

**\* 48. Patient mit der Nummer 41**

Patient with the number 41

|                       |                       |                       |                       |
|-----------------------|-----------------------|-----------------------|-----------------------|
| Rot<br>Red            | Gelb<br>Yellow        | Grün<br>Green         | Schwarz<br>Black      |
| <input type="radio"/> | <input type="radio"/> | <input type="radio"/> | <input type="radio"/> |

**\* 49. Patient mit der Nummer 42**

Patient with the number 42

|                       |                       |                       |                       |
|-----------------------|-----------------------|-----------------------|-----------------------|
| Rot<br>Red            | Gelb<br>Yellow        | Grün<br>Green         | Schwarz<br>Black      |
| <input type="radio"/> | <input type="radio"/> | <input type="radio"/> | <input type="radio"/> |

**\* 50. Patient mit der Nummer 43**

Patient with the number 43

|                       |                       |                       |                       |
|-----------------------|-----------------------|-----------------------|-----------------------|
| Rot<br>Red            | Gelb<br>Yellow        | Grün<br>Green         | Schwarz<br>Black      |
| <input type="radio"/> | <input type="radio"/> | <input type="radio"/> | <input type="radio"/> |

**\* 51. Patient mit der Nummer 44**

Patient with the number 44

|                       |                       |                       |                       |
|-----------------------|-----------------------|-----------------------|-----------------------|
| Rot<br>Red            | Gelb<br>Yellow        | Grün<br>Green         | Schwarz<br>Black      |
| <input type="radio"/> | <input type="radio"/> | <input type="radio"/> | <input type="radio"/> |

**\* 52. Patient mit der Nummer 45**

Patient with the number 45

|                       |                       |                       |                       |
|-----------------------|-----------------------|-----------------------|-----------------------|
| Rot<br>Red            | Gelb<br>Yellow        | Grün<br>Green         | Schwarz<br>Black      |
| <input type="radio"/> | <input type="radio"/> | <input type="radio"/> | <input type="radio"/> |

**\* 53. Patient mit der Nummer 46**

Patient with the number 46

|                       |                       |                       |                       |
|-----------------------|-----------------------|-----------------------|-----------------------|
| Rot<br>Red            | Gelb<br>Yellow        | Grün<br>Green         | Schwarz<br>Black      |
| <input type="radio"/> | <input type="radio"/> | <input type="radio"/> | <input type="radio"/> |

**\* 54. Patient mit der Nummer 47**

Patient with the number 47

|                       |                       |                       |                       |
|-----------------------|-----------------------|-----------------------|-----------------------|
| Rot<br>Red            | Gelb<br>Yellow        | Grün<br>Green         | Schwarz<br>Black      |
| <input type="radio"/> | <input type="radio"/> | <input type="radio"/> | <input type="radio"/> |

\* 55. Patient mit der Nummer 48

Patient with the number 48

Rot  
Red

Gelb  
Yellow

Grün  
Green

Schwarz  
Black

\* 56. Patient mit der Nummer 49

Patient with the number 49

Rot  
Red

Gelb  
Yellow

Grün  
Green

Schwarz  
Black

\* 57. Patient mit der Nummer 50

Patient with the number 50

Rot  
Red

Gelb  
Yellow

Grün  
Green

Schwarz  
Black

Vergleich der Vorsichtungs- Qualität von militärischen und zivilen  
Rettungskräften bei einem simulierten Terror- MANV während des Einsatzes am  
WEF in Davos 20.1.-24.1.2020 / Comparison of Triage Quality of Military and  
Civilian Emergency Staff

**Fragen zu den Simulationsmethoden / Questions according the  
simulation methods**

**Die Vor-Sichtung ist beendet bitte schätzen Sie ihr persönliches Ergebnis ein /  
The pre-triage is finished, please estimate your personal result**

\* 58. Wieviele der Schauspielpatienten haben Sie richtig triagiert?/  
how many human patients did you triage correct?

\* 59. Wieviele der Patientenkarten haben Sie richtig triagiert?/  
how many patient cards did you triage correct?





Vergleich der Vorsichtungs- Qualität von militärischen und zivilen  
Rettungskräften bei einem simulierten Terror- MANV während des Einsatzes am  
WEF in Davos 20.1.-24.1.2020 / Comparison of Triage Quality of Military and  
Civilian Emergency Staff

**Vielen Dank! / Thank you very much!**

67. Kommentare zur Studie / comments
